# Supplementary material
Source: Elsevier journal article supplement (https://www.sciencedirect.com/science/article/pii/S0300893217307546)

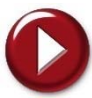

## Supplementary material

---

### In Vivo Evaluation of the Synergic Effect of Metformin and mTOR Inhibitors on the Endothelial Healing of Drug-eluting Stents in Diabetic Patients

---

#### SUPPLEMENTARY MATERIAL

**Figure.** Spatial distribution of the strut type of each lesion according to glucose-lowering agents received: no metformin vs metformin in non-ITDM patient vs metformin in ITDM patient; y axis represents the 2-dimensional angle distribution (0-360°) of the struts in each 1 mm OCT cross-section; x axis represents each 1 mm in-stent OCT cross-sections from distal (left) to proximal (right). A blue dot represents a covered strut, whereas red squares represent uncovered struts. Multivariate analyses showed no effect of MF on the rate of uncovered struts regardless the insulin status and the DES allocated by randomization ( $P = .29$ ). ITDM, insulin treated diabetes mellitus; MF, metformin; non-ITDM, noninsulin treated diabetes mellitus OCT, optical coherence tomography.

● Covered struts

■ Uncovered struts

No Metformin

Non-ITDM with Metformin

ITDM with Metformin

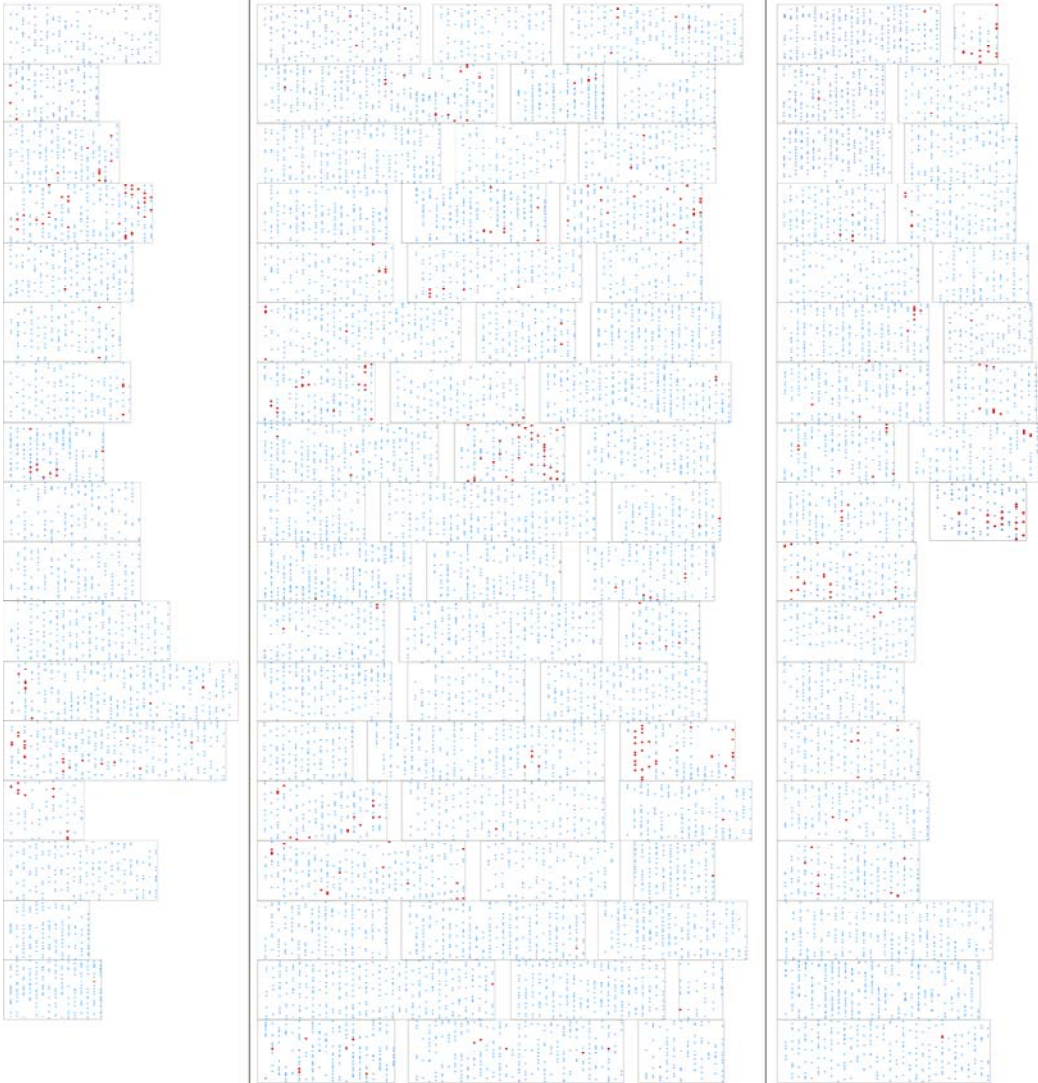

Supplement: mmc1 [file S0300893217307546:mmc1.pdf]
